# Supplementary material
Source: PubMed Central journal article supplement (PMC3788614)
Supplement: NIHMS515427-supplement-supplement_1.pdf [file NIHMS515427-supplement-supplement_1.pdf]

**Supplemental Figure 1.** PD-1 controls TFR cells in NP-OVA immunized mice. **(a)** WT or PD-1<sup>-/-</sup> mice were immunized with NP-OVA emulsified in CFA and 7 days later draining lymph nodes were stained for CD4<sup>+</sup>FoxP3<sup>+</sup>ICOS<sup>+</sup>CXCR5<sup>+</sup>CD19<sup>-</sup> T follicular regulatory cells (TFR) and CD4<sup>+</sup>FoxP3<sup>-</sup>ICOS<sup>+</sup>CXCR5<sup>+</sup>CD19<sup>-</sup> T follicular helper cells (TFH) using gating strategy shown. **(b)** TFH cells were gated and expressed as a percentage of CD4<sup>+</sup>FoxP3<sup>-</sup> cells. **(c)** TFR cells were gated and expressed as a percentage of all CD4<sup>+</sup> cells. **(d)** TFR cells were gated and expressed as a percentage of CD4<sup>+</sup>FoxP3<sup>+</sup> cells. **(e)** TFR cells were gated and expressed as a percentage of CD4<sup>+</sup>CXCR5<sup>+</sup>ICOS<sup>+</sup> cells.

**Supplemental Figure 2.** Comparison of PD-L1, CD103 and GITR expression on WT and PD-1<sup>-/-</sup> T Follicular Regulatory Cells. **(a-c)** WT or PD-1<sup>-/-</sup> mice were immunized with MOG (35-55) and 7 days later draining lymph nodes were stained. TFR (CD4<sup>+</sup>ICOS<sup>+</sup>CXCR5<sup>+</sup>FoxP3<sup>+</sup>CD19<sup>-</sup>) cells were analyzed for surface expression of PD-L1 **(a)**, CD103 **(b)** and GITR **(c)**.

**Supplemental Figure 3.** WT and PD-1 deficient TFR cells express similar levels of GITR. WT and PD-1<sup>-/-</sup> mice were immunized with NP-OVA and 7 days later populations were sorted according to gating strategy.

**Supplemental Figure 4.** TFH and TFR cells can bind similar levels of anti-CD3. **(a)** Gating of TFH, TFR and B cells from *in vitro* suppression assays as in Figure 4k. **(b)**

Cells gated as in (a) were stained with an anti-hamster secondary antibody to quantify the amount of anti-CD3 bound to the surface of the cells.

**Supplemental Figure 5.** Blood TFH and TFR cells express central memory homing markers. WT and PD-1<sup>-/-</sup> mice were immunized with MOG/CFA and 7 days later populations from blood were analyzed for CD62L (a) and CD44 (b) expression. (c) PD-1 expression was compared on WT and PD-1 deficient mice from draining lymph node and blood TFH and TFR cells 7 days after NP-OVA immunization.

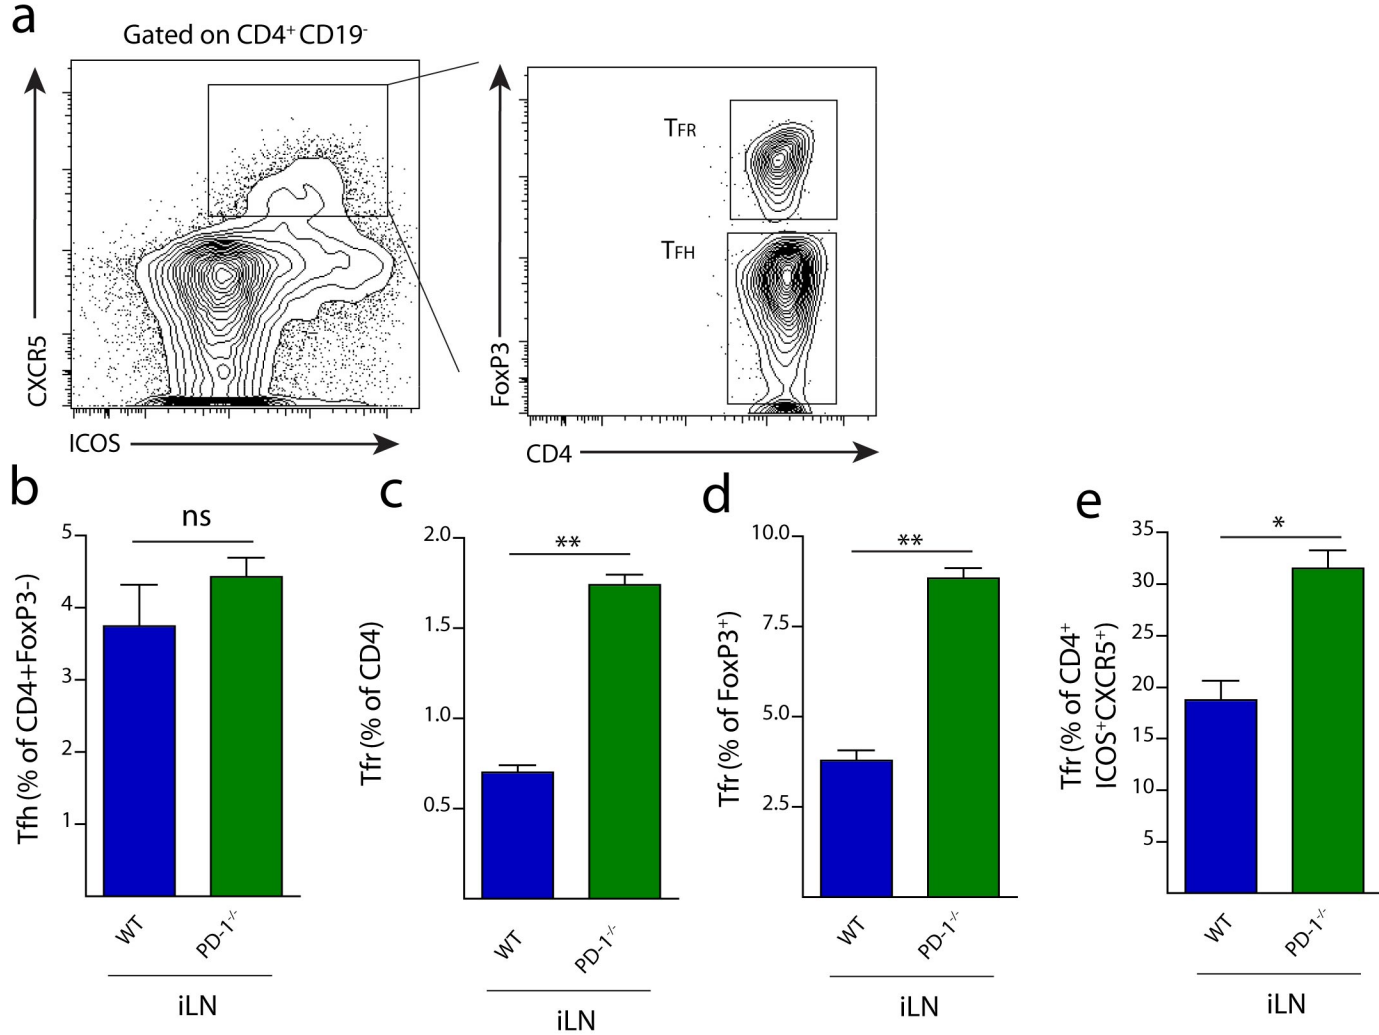

Supplemental Figure 1

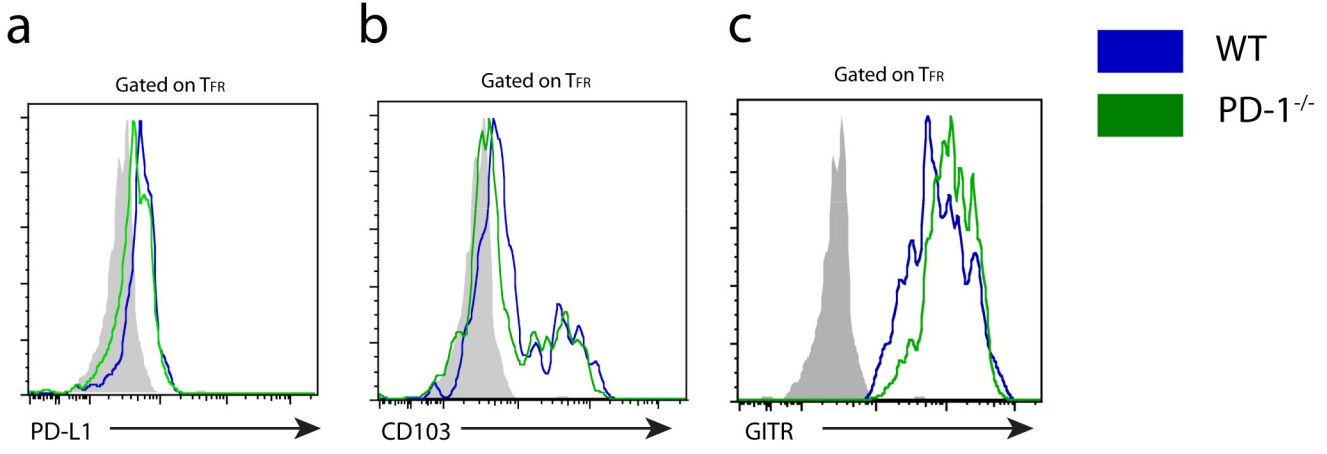

Supplemental Figure 2

a.

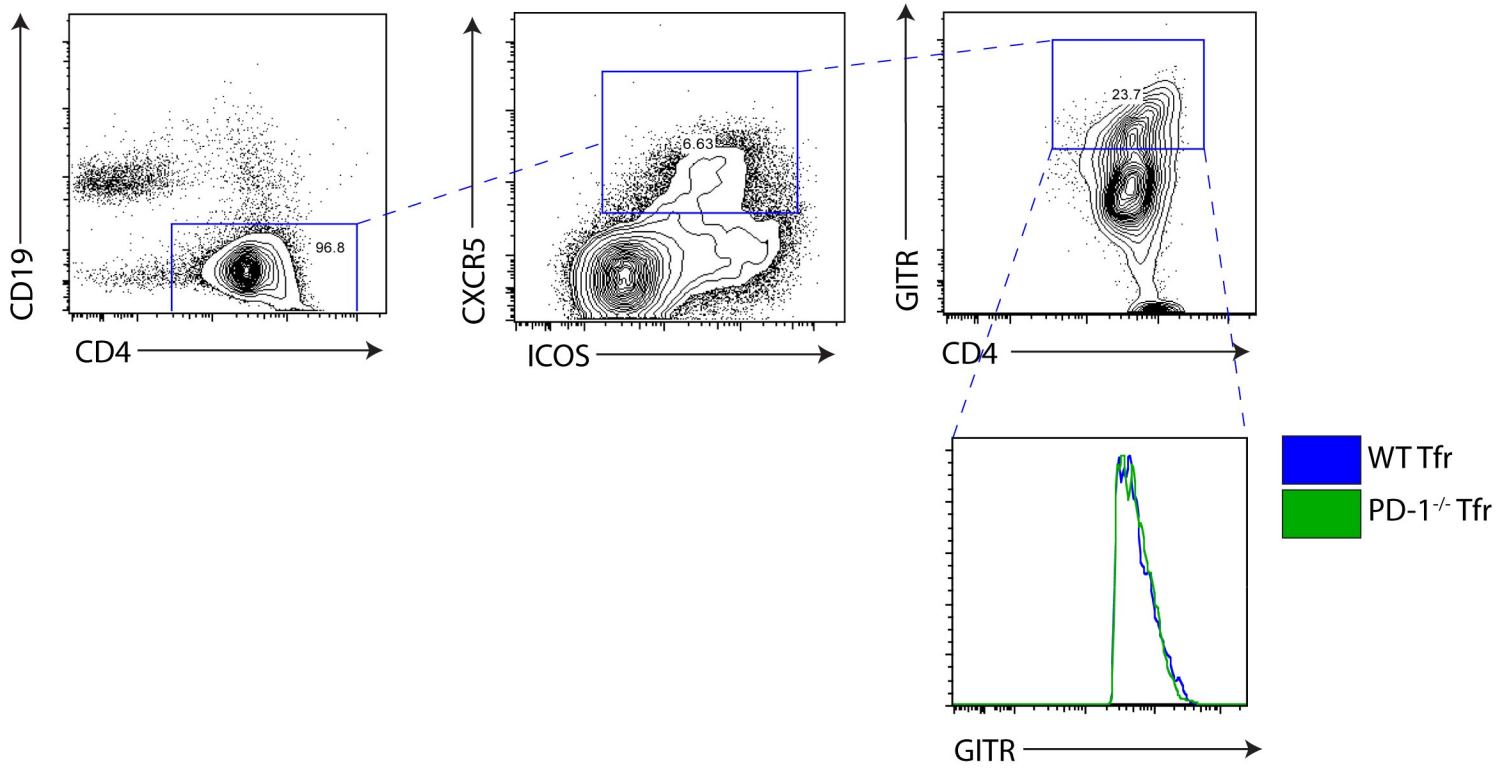

Supplemental Figure 3

a.

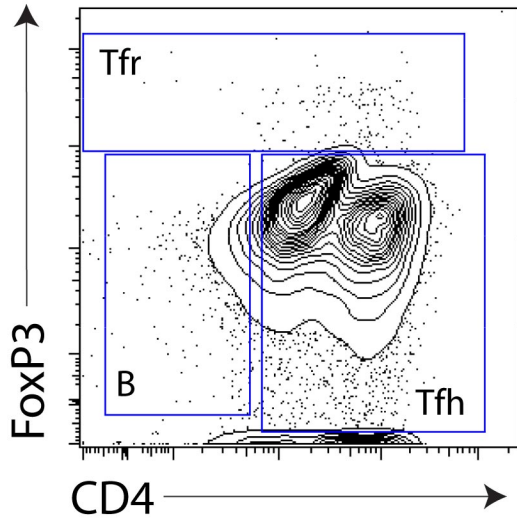

b.

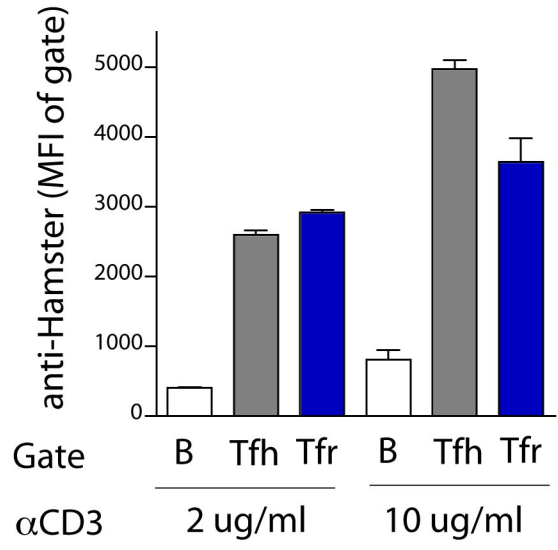

Supplemental Figure 4

**a**

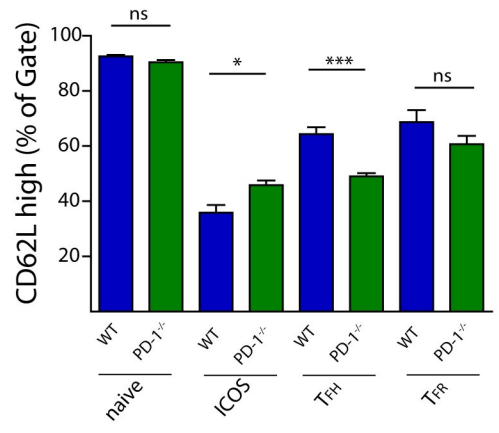

**b**

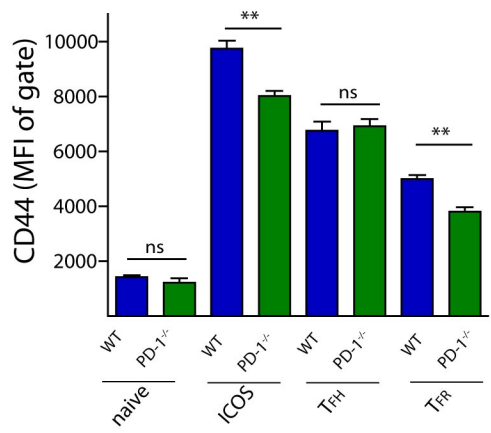

**c**

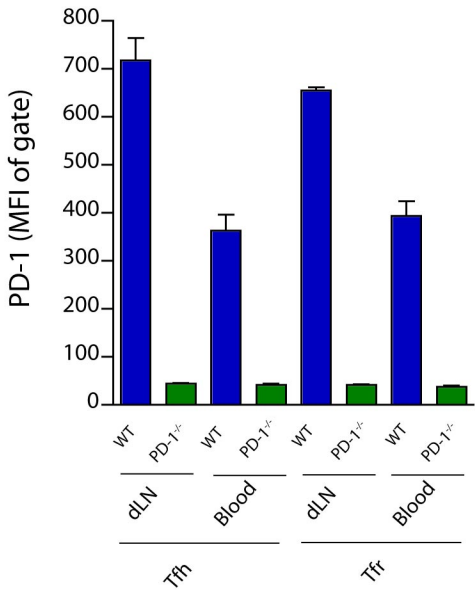

Supplemental Figure 5
